# Supplementary material for: Hyperbranched PdRu nanospine assemblies: an efficient electrocatalyst for formic acid oxidation
Source: Royal Society of Chemistry journal article supplement (doi:10.1039/c8ta06908e), 2018-01-01
Supplement: c8ta06908e1.pdf [file c8ta06908e1.pdf]

Supporting Information for

**Hyperbranched PdRu nanospine assemblies: an efficient electrocatalyst for  
formic acid oxidation**

Hongjing Wang, Yinghao Li, Chunjie Li, Ziqiang Wang, You Xu, Xiaonian Li,

Hairong Xue\*, Liang Wang\*

State Key Laboratory Breeding Base of Green-Chemical Synthesis Technology, College of  
Chemical Engineering, Zhejiang University of Technology, Hangzhou, Zhejiang 310014, P. R.  
China

\*Corresponding authors:

E-mails: xuehairong@zjut.edu.cn; wangliang@zjut.edu.cn

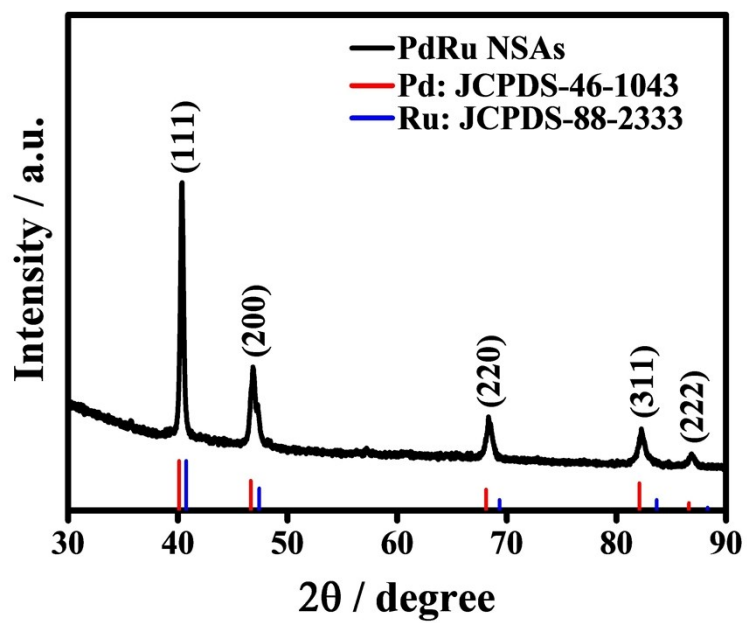

Fig. S1 XRD pattern of the PdRu NSAs.

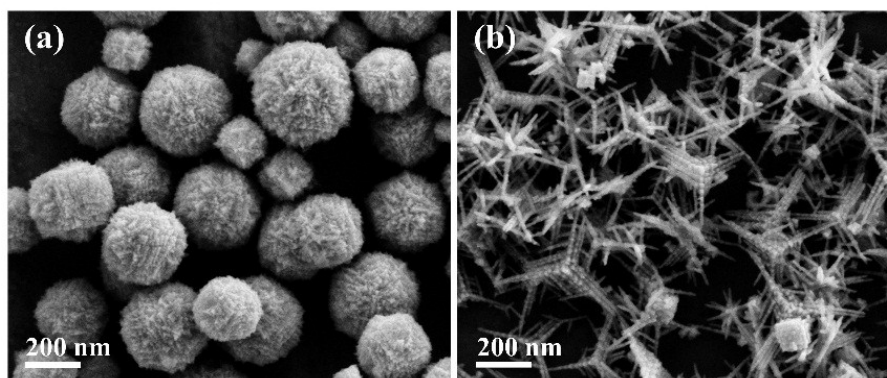

Fig. S2 SEM images of the samples prepared with different amounts of KBr under the typical synthesis: (a) 0 mg, (b) 10 mg.

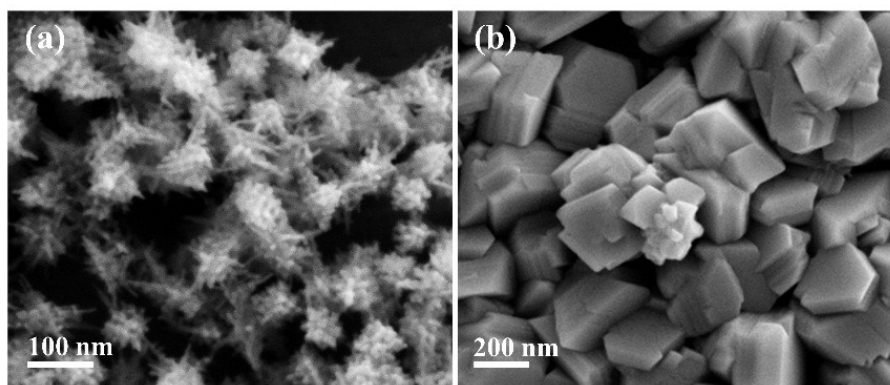

**Fig. S3** SEM images of the samples prepared by replacing KBr with (a) KCl and (b) KI, respectively, under the typical synthesis.

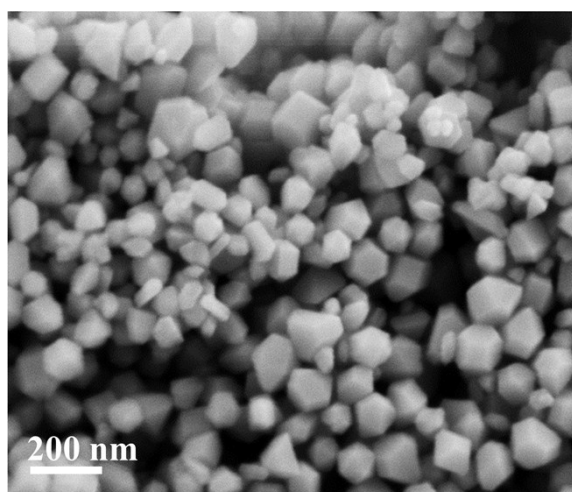

**Fig. S4** SEM image of Pd nanoparticles (Pd NPs) prepared without  $\text{RuCl}_3$  under the typical synthesis.

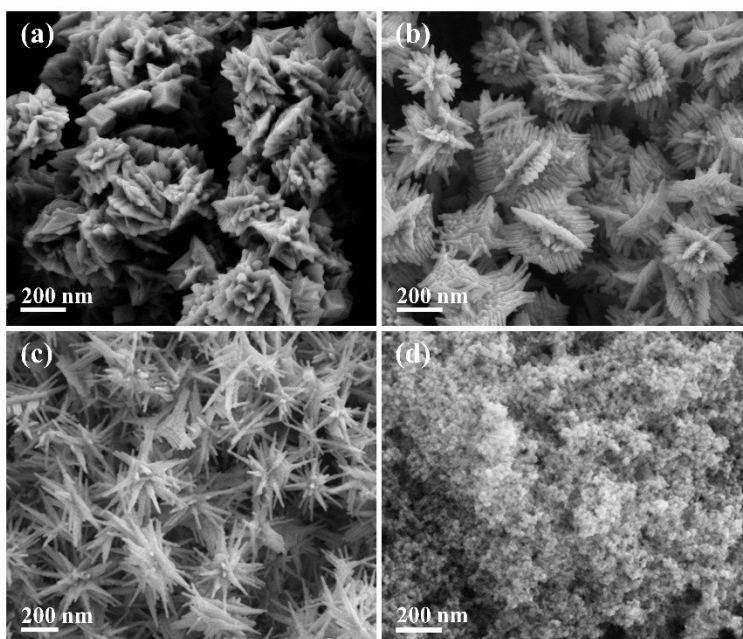

**Fig. S5** SEM images of the samples prepared with the different molar ratio of the Pd/Ru precursors under the typical synthesis. The added metallic precursor amounts of  $\text{Na}_2\text{PdCl}_4$  and  $\text{RuCl}_3$  are (a) 2.25 mL and 0.75 mL, (b) 1.5 mL and 1.5 mL, (c) 0.4 mL and 2.6 mL, and (d) 0.2 mL and 2.8 mL respectively.

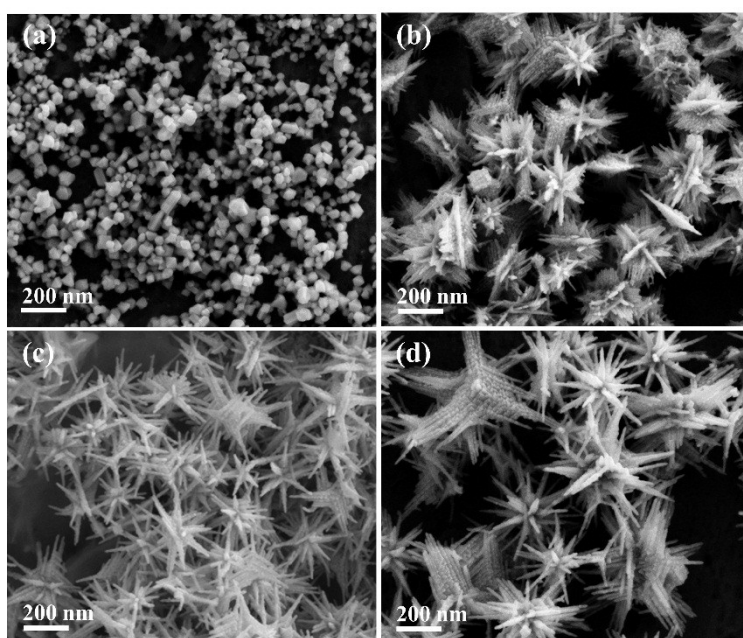

**Fig. S6** SEM images of the samples prepared with different amounts of HCl under the typical synthesis: (a) 0 mL, (b) 0.05 mL, (c) 0.1 mL, (d) 0.2 mL.

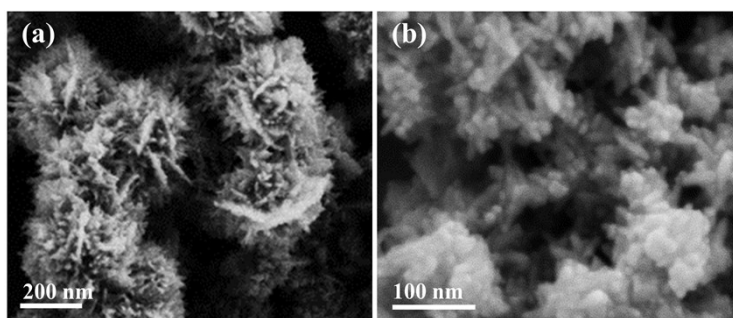

**Fig. S7** SEM images of the samples prepared (a) without F127 and (b) with PVP, respectively, under the typical synthesis.

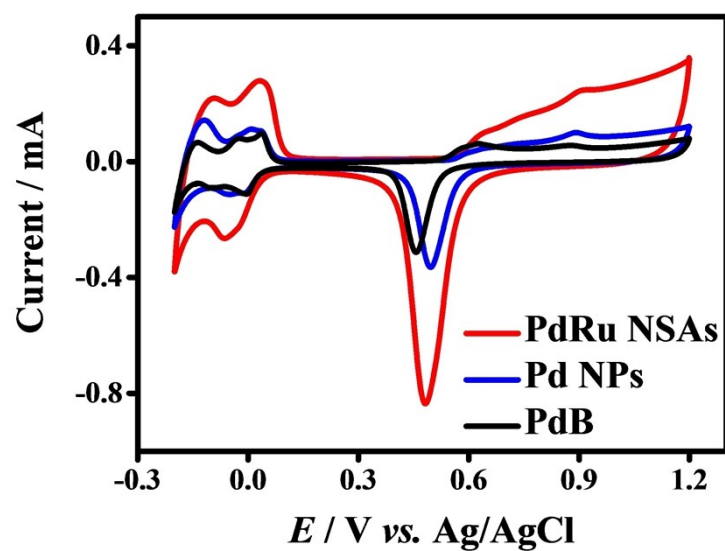

**Fig. S8** CV curves of the catalysts in 0.5 M H<sub>2</sub>SO<sub>4</sub> solution.

**Table S1. The comparisons of the FOR performance of the catalysts.**

| <b>Catalyst</b>                         | <b>Condition</b>                                          | <b>Mass activity<br/>(mA mg<sup>-1</sup>)</b> | <b>Ref.</b>             |
|-----------------------------------------|-----------------------------------------------------------|-----------------------------------------------|-------------------------|
| <b>PdRu NSAs</b>                        | <b>0.5 M H<sub>2</sub>SO<sub>4</sub>+ 0.5<br/>M HCOOH</b> | <b>1105.8</b>                                 | <b>Current<br/>work</b> |
| Mesoporous Pd<br>Films                  | 0.5 M H <sub>2</sub> SO <sub>4</sub> + 0.5<br>M HCOOH     | 934.6                                         | 1                       |
| Porous Pd<br>Nanosheets                 | 0.5 M H <sub>2</sub> SO <sub>4</sub> + 0.5<br>M HCOOH     | 409.3                                         | 2                       |
| Pd arrow- headed<br>tripods             | 0.5 M H <sub>2</sub> SO <sub>4</sub> + 0.5<br>M HCOOH     | 493.0                                         | 3                       |
| Mesoporous Pd<br>nanoparticles          | 0.5 M H <sub>2</sub> SO <sub>4</sub> + 0.5<br>M HCOOH     | 735.6                                         | 4                       |
| 3D super-branched<br>PdCu               | 0.5 M H <sub>2</sub> SO <sub>4</sub> + 0.5<br>M HCOOH     | 808.0                                         | 5                       |
| PdNi hollow<br>nanocrystals             | 0.5 M H <sub>2</sub> SO <sub>4</sub> + 0.5<br>M HCOOH     | 768.0                                         | 6                       |
| Bi-modified<br>palladium<br>nanotubes   | 0.5 M H <sub>2</sub> SO <sub>4</sub> + 0.5<br>M HCOOH     | 397.0                                         | 7                       |
| Pd-Ag alloy<br>hollow<br>nanostructures | 0.1 M HClO <sub>4</sub> + 0.1<br>M HCOOH                  | 602.8                                         | 8                       |
| CuPd@Pd<br>tetrahedra                   | 0.5 M H <sub>2</sub> SO <sub>4</sub> + 0.5<br>M HCOOH     | 501.8                                         | 9                       |
| Pd nanosheets                           | 0.1 M HClO <sub>4</sub> + 0.2<br>M HCOOH                  | 634.3                                         | 10                      |
| PtAgCu@PtCu                             | 0.5 M H <sub>2</sub> SO <sub>4</sub> + 0.5<br>M HCOOH     | 314.0                                         | 11                      |
| Porous PtAg@Pt                          | 0.5 M H <sub>2</sub> SO <sub>4</sub> + 0.5<br>M HCOOH     | 282.6                                         | 12                      |

## Reference

- [1] C. Li, B. Jiang, N. Miyamoto, J. H. Kim, V. Malgras and Y. Yamauchi, *J. Am. Chem. Soc.*, 2015, **137**, 11558-11561.
- [2] X. Qiu, H. Zhang, P. Wu, F. Zhang, S. Wei, D. Sun, L. Xu and Y. Tang, *Adv. Funct. Mater.*, 2017, **27**, 1603852.
- [3] N. Su, X. Chen, Y. Ren, B. Yue, H. Wang, W. Cai and H. He, *Chem. Commun.*, 2015, **51**, 7195-7198.
- [4] C. Li, T. Sato and Y. Yamauchi, *Chem. Commun.*, 2014, **50**, 11753-11756.
- [5] M. Iqbal, C. Li, J. H. Kim, S. M. Alshehri, T. Nakayama and Y. Yamauchi, *Chem. Eur. J.*, 2016, **22**, 17.
- [6] Z. Chen, J. Zhang, Y. Zhang, Y. Liu, X. Han, C. Zhong, W. Hu and Y. Deng, *Nano Energy*, 2017, **42**, 353-362.
- [7] R. W. Atkinson, S. St. John, O. Dyck, K. A. Unocic, R. R. Unocic, C. S. Burke, J. W. Cisco, C. A. Rice, T. A. Zawodzinski and A. B. Papandrew, *ACS Catal.*, 2015, **5**, 5154-5163.
- [8] D. Liu, M. Xie, C. Wang, L. Liao, L. Qiu, J. Ma, H. Huang, R. Long, J. Jiang and Y. Xiong, *Nano Res.*, 2016, **9**, 1590-1599.
- [9] Y. Chen, Y. Yang, G. Fu, L. Xu, D. Sun, J. M. Lee and Y. Tang, *J. Mater. Chem. A*, 2018, **6**, 10632-10638.
- [10] Y. Zhang, M. Wang, E. Zhu, Y. Zheng, Y. Huang and X. Huang, *Nano Lett.*, 2015, **15**, 7519-7525.
- [11] G. Fu, B. Xia, R. Ma, Y. Chen, Y. Tang and J.-M. Lee, *Nano Energy*, 2015, **12**, 824-832.
- [12] X. Jiang, X. Yan, W. Ren, Y. Jia, J. Chen, D. Sun, L. Xu and Y. Tang, *ACS Appl. Mater. Inter.*, 2016, **8**, 31076-31082.
